# Supplementary material
Source: HighWire-hosted journal article supplement (https://www.cmaj.ca/highwire/filestream/150536/field_highwire_adjunct_files/0/230816-res-1-at.pdf)
Supplement: 230816-res-1-at.pdf [file 230816-res-1-at.pdf]

## Appendix 1: Explanation of physician payment models and Ontario’s Patient Enrollment Model

| Name                             | Explanation                                                                                                                                                                                                                                                                                                                                                                                              |
|----------------------------------|----------------------------------------------------------------------------------------------------------------------------------------------------------------------------------------------------------------------------------------------------------------------------------------------------------------------------------------------------------------------------------------------------------|
| <b>Enhanced-Fee-For Service</b>  | This group includes physicians funded through both entirely or majority fee-for-service. For example those in Family Health Groups are paid mainly fee-for-service, along small incentives and bonuses to encourage high quality comprehensive care.                                                                                                                                                     |
| <b>Capitation</b>                | These models require patient rostering. The main example is Family Health Organizations - physicians in these models are paid mainly via capitation blended with relatively small amounts by fee-for-service, plus minor incentive and bonus components, with certain requirements for after hours care.                                                                                                 |
| <b>Family Health Team</b>        | Physicians in these models are usually paid as per the capitation group, but also benefit from formal links to government-funded interdisciplinary teams (e.g. registered nurses, dietitians, social workers, pharmacists) providing ongoing health care.                                                                                                                                                |
| <b>Other primary care models</b> | These models are mainly salary-based, such as those working in Community Health Centers, which employ teams of physicians, nurse practitioners, nurses, counsellors, community workers and dietitians that serve high-risk communities and populations who may have trouble accessing health services because of language, culture, physical disabilities, socioeconomic status or geographic isolation. |

### Background on the primary care patient enrollment system in Ontario

The patient enrollment model formalizes a continuing relationship between the physician and the patient . Patient enrollment model (PEM) involves a dual commitment from both the patient and physician, which benefits both parts. The Ontario Ministry of Health and Long-Term Care have established the regulations to perform the formal enrollment process in primary care practices in Ontario.

Patient enrollment models (PEM) consist of voluntary patient enrollment with a primary care physician who participates in any of the Ontario primary care models. These models are aimed at rewarding family physicians for providing comprehensive primary care services to their patients based upon alternative funding contracts which set out physician’s obligations of Currently there are several patient enrollment models in Ontario, including family health groups, family health networks, family health organizations, family health teams,

comprehensive care model. To enroll, a patient must complete and sign the Patient Enrollment and Consent to Release Personal Health Information form.
